# Supplementary material for: Microbiota modulation counteracts Alzheimer’s disease progression influencing neuronal proteolysis and gut hormones plasma levels
Source: PubMed Central journal article supplement (PMC5445077; doi:10.1038/s41598-017-02587-2), 2017-05-25

## Supplemental information:

**TITLE:** Microbiota modulation counteracts Alzheimer's disease progression influencing neuronal proteolysis and gut hormones plasma levels

**AUTHORS:** Bonfili Laura<sup>\*1</sup>, Cecarini Valentina<sup>1</sup>, Berardi Sara<sup>1</sup>, Scarpona Silvia<sup>1</sup>, Suchodolski Jan S.<sup>2</sup>, Nasuti Cinzia<sup>3</sup>, Fiorini Dennis<sup>4</sup>, Boarelli Maria Chiara<sup>4</sup>, Rossi Giacomo<sup>1</sup>, Eleuteri Anna Maria<sup>1</sup>

<sup>1</sup> School of Biosciences and Veterinary Medicine, University of Camerino, via Gentile III da Varano, 62032 Camerino (MC), ITALY

<sup>2</sup> Gastrointestinal Laboratory, Department of Small Animal Clinical Sciences, College of Veterinary Medicine and Biomedical Sciences, Texas A&M University, USA

<sup>3</sup> School of Pharmacy, Pharmacology Unit, University of Camerino, via Madonna delle Carceri, 62032 Camerino (MC), ITALY

<sup>4</sup> Division of Chemistry, School of Science and Technology, University of Camerino, I-62032 Camerino, MC, Italy.

**Supplemental Table S1: Differences in bacterial taxa between 24 weeks-old wt mice and 3xTg-AD mice (untreated).**

| Taxa             | Alzheimer Control |       | Wild Type Control |      | p-value | q-value |
|------------------|-------------------|-------|-------------------|------|---------|---------|
|                  | mean              | SD    | mean              | SD   |         |         |
| <b>Phylum</b>    |                   |       |                   |      |         |         |
| Unassigned;other | 0.15              | 0.03  | 0.19              | 0.03 | 0.048   | 0.119   |
| Actinobacteria   | 0.10              | 0.07  | 0.06              | 0.02 | 0.248   | 0.276   |
| Bacteroidetes    | 41.78             | 16.82 | 51.20             | 7.27 | 0.149   | 0.248   |
| Cyanobacteria    | 0.01              | 0.00  | 0.05              | 0.03 | 0.001   | 0.003   |
| Deferribacteres  | 0.00              | 0.00  | 0.00              | 0.00 | 0.246   | 0.276   |
| Firmicutes       | 42.99             | 15.25 | 35.58             | 5.91 | 0.248   | 0.276   |
| Proteobacteria   | 14.52             | 11.52 | 8.07              | 3.62 | 0.336   | 0.336   |
| TM7              | 0.05              | 0.05  | 0.16              | 0.10 | 0.024   | 0.079   |
| Tenericutes      | 0.37              | 0.25  | 2.13              | 0.60 | 0.001   | 0.003   |
| Verrucomicrobia  | 0.03              | 0.02  | 2.56              | 4.63 | 0.083   | 0.165   |
| <b>Class</b>     |                   |       |                   |      |         |         |
| Unassigned;Other | 0.15              | 0.03  | 0.19              | 0.03 | 0.048   | 0.172   |
| Actinobacteria   | 0.00              | 0.00  | 0.00              | 0.00 | 0.916   | 0.916   |
| Coriobacteriia   | 0.10              | 0.07  | 0.06              | 0.01 | 0.268   | 0.424   |
| Bacteroidia      | 41.77             | 16.82 | 51.19             | 7.27 | 0.149   | 0.314   |
| phingobacteriia  | 0.00              | 0.01  | 0.02              | 0.02 | 0.143   | 0.314   |
| 4C0d-2           | 0.00              | 0.00  | 0.04              | 0.03 | 0.001   | 0.005   |

|                        |       |       |       |      |       |       |
|------------------------|-------|-------|-------|------|-------|-------|
| Chloroplast            | 0.01  | 0.00  | 0.01  | 0.00 | 0.728 | 0.777 |
| Deferribacteres        | 0.00  | 0.00  | 0.00  | 0.00 | 0.246 | 0.424 |
| Bacilli                | 3.63  | 5.57  | 2.67  | 1.23 | 0.248 | 0.424 |
| Clostridia             | 39.16 | 14.36 | 32.82 | 5.78 | 0.501 | 0.594 |
| Erysipelotrichi        | 0.20  | 0.14  | 0.10  | 0.04 | 0.470 | 0.594 |
| Alphaproteobacteria    | 0.27  | 0.67  | 0.21  | 0.17 | 0.034 | 0.162 |
| Betaproteobacteria     | 0.14  | 0.24  | 0.07  | 0.04 | 0.736 | 0.777 |
| Deltaproteobacteria    | 0.48  | 0.39  | 0.19  | 0.16 | 0.054 | 0.172 |
| Epsilonproteobacteria  | 13.60 | 11.89 | 7.57  | 3.53 | 0.441 | 0.594 |
| Gammaaproteobacteria   | 0.02  | 0.02  | 0.03  | 0.01 | 0.439 | 0.594 |
| TM7-3                  | 0.05  | 0.05  | 0.16  | 0.10 | 0.024 | 0.149 |
| Mollicutes             | 0.37  | 0.25  | 2.13  | 0.60 | 0.001 | 0.005 |
| Verrucomicrobiae       | 0.03  | 0.02  | 2.56  | 4.63 | 0.083 | 0.224 |
| <b>Order</b>           |       |       |       |      |       |       |
| Unassigned;other       | 0.15  | 0.03  | 0.19  | 0.03 | 0.048 | 0.167 |
| Bifidobacteriales      | 0.00  | 0.00  | 0.00  | 0.00 | 0.584 | 0.654 |
| Coriobacteriales       | 0.10  | 0.07  | 0.06  | 0.01 | 0.268 | 0.441 |
| Bacteroidales          | 41.77 | 16.82 | 51.19 | 7.27 | 0.149 | 0.321 |
| Sphingobacteriales     | 0.00  | 0.01  | 0.02  | 0.02 | 0.143 | 0.321 |
| YS2                    | 0.00  | 0.00  | 0.04  | 0.03 | 0.000 | 0.006 |
| Streptophyta           | 0.01  | 0.00  | 0.00  | 0.01 | 0.548 | 0.639 |
| Deferribacterales      | 0.00  | 0.00  | 0.00  | 0.00 | 0.246 | 0.430 |
| Bacillales             | 0.00  | 0.01  | 0.00  | 0.00 | 0.101 | 0.257 |
| Lactobacillales        | 2.47  | 2.65  | 2.64  | 1.23 | 0.211 | 0.422 |
| Turicibacterales       | 1.15  | 3.13  | 0.02  | 0.01 | 0.033 | 0.130 |
| Clostridiales          | 39.16 | 14.36 | 32.82 | 5.78 | 0.501 | 0.637 |
| Erysipelotrichales     | 0.20  | 0.14  | 0.10  | 0.04 | 0.470 | 0.627 |
| RF32                   | 0.00  | 0.00  | 0.14  | 0.14 | 0.000 | 0.006 |
| Rhizobiales            | 0.23  | 0.63  | 0.03  | 0.05 | 0.923 | 0.923 |
| Rickettsiales          | 0.03  | 0.04  | 0.02  | 0.03 | 0.626 | 0.674 |
| Sphingomonadales       | 0.00  | 0.00  | 0.01  | 0.01 | 0.403 | 0.594 |
| Burkholderiales        | 0.14  | 0.24  | 0.07  | 0.04 | 0.700 | 0.726 |
| Desulfovibrionales     | 0.48  | 0.39  | 0.19  | 0.16 | 0.054 | 0.168 |
| Campylobacteriales     | 13.60 | 11.89 | 7.57  | 3.53 | 0.441 | 0.618 |
| Enterobacteriales      | 0.01  | 0.01  | 0.02  | 0.01 | 0.245 | 0.430 |
| Pseudomonadales        | 0.00  | 0.00  | 0.00  | 0.00 | 0.290 | 0.451 |
| Xanthomonadales        | 0.00  | 0.01  | 0.00  | 0.00 | 0.547 | 0.639 |
| CW040                  | 0.05  | 0.05  | 0.16  | 0.10 | 0.024 | 0.110 |
| Anaeroplasmatales      | 0.18  | 0.22  | 1.32  | 0.64 | 0.001 | 0.010 |
| Mycoplasmatales        | 0.01  | 0.01  | 0.40  | 0.51 | 0.015 | 0.083 |
| RF39                   | 0.18  | 0.15  | 0.41  | 0.17 | 0.005 | 0.037 |
| Verrucomicrobiales     | 0.03  | 0.02  | 2.56  | 4.63 | 0.083 | 0.232 |
| <b>Family</b>          |       |       |       |      |       |       |
| Unassigned;Other       | 0.15  | 0.03  | 0.19  | 0.03 | 0.048 | 0.156 |
| Bifidobacteriaceae     | 0.00  | 0.00  | 0.00  | 0.00 | 0.584 | 0.656 |
| Coriobacteriaceae      | 0.10  | 0.07  | 0.06  | 0.01 | 0.268 | 0.456 |
| o__Bacteroidales;Other | 0.00  | 0.00  | 0.00  | 0.00 | 0.155 | 0.355 |
| ;o__Bacteroidales;f__  | 0.09  | 0.09  | 0.01  | 0.01 | 0.021 | 0.086 |
| Bacteroidaceae         | 2.41  | 3.09  | 4.04  | 1.69 | 0.068 | 0.183 |
| Prevotellaceae         | 0.01  | 0.01  | 0.07  | 0.10 | 0.698 | 0.731 |
| Rikenellaceae          | 3.88  | 2.51  | 4.33  | 1.91 | 0.564 | 0.648 |
| S24-7                  | 28.23 | 15.35 | 37.13 | 6.31 | 0.248 | 0.439 |

|                                          |       |       |       |      |       |       |
|------------------------------------------|-------|-------|-------|------|-------|-------|
| [Odoribacteraceae]                       | 4.45  | 4.34  | 5.59  | 2.07 | 0.211 | 0.439 |
| [Paraprevotellaceae]                     | 2.69  | 3.03  | 0.01  | 0.01 | 0.001 | 0.008 |
| Sphingobacteriaceae                      | 0.00  | 0.01  | 0.02  | 0.02 | 0.143 | 0.346 |
| o__YS2;f__                               | 0.00  | 0.00  | 0.04  | 0.03 | 0.000 | 0.008 |
| o__Streptophyta;f__                      | 0.01  | 0.00  | 0.00  | 0.01 | 0.548 | 0.648 |
| Deferribacteraceae                       | 0.00  | 0.00  | 0.00  | 0.00 | 0.246 | 0.439 |
| Enterococcaceae                          | 0.04  | 0.10  | 0.00  | 0.00 | 0.002 | 0.017 |
| Lactobacillaceae                         | 2.40  | 2.66  | 2.64  | 1.23 | 0.178 | 0.390 |
| Streptococcaceae                         | 0.03  | 0.02  | 0.01  | 0.00 | 0.011 | 0.063 |
| Turicibacteraceae                        | 1.15  | 3.13  | 0.02  | 0.01 | 0.033 | 0.115 |
| o__Clostridiales;Other                   | 0.68  | 1.46  | 0.04  | 0.02 | 0.434 | 0.580 |
| o__Clostridiales;f__                     | 22.93 | 7.48  | 19.72 | 3.24 | 0.441 | 0.580 |
| Christensenellaceae                      | 0.01  | 0.01  | 0.00  | 0.00 | 0.055 | 0.158 |
| Clostridiaceae                           | 0.31  | 0.29  | 0.13  | 0.08 | 0.387 | 0.574 |
| Dehalobacteriaceae                       | 0.18  | 0.08  | 0.23  | 0.07 | 0.229 | 0.439 |
| Lachnospiraceae                          | 9.56  | 6.29  | 7.64  | 4.16 | 0.387 | 0.574 |
| Peptococcaceae                           | 0.04  | 0.05  | 0.02  | 0.01 | 0.885 | 0.904 |
| Peptostreptococcaceae                    | 0.03  | 0.06  | 0.00  | 0.00 | 0.018 | 0.081 |
| Ruminococcaceae                          | 5.37  | 1.65  | 5.02  | 1.12 | 0.501 | 0.622 |
| [Mogibacteriaceae]                       | 0.06  | 0.04  | 0.01  | 0.01 | 0.002 | 0.016 |
| Erysipelotrichaceae                      | 0.20  | 0.14  | 0.10  | 0.04 | 0.470 | 0.601 |
| o__RF32;f__                              | 0.00  | 0.00  | 0.14  | 0.14 | 0.000 | 0.008 |
| Methylobacteriaceae                      | 0.00  | 0.00  | 0.00  | 0.00 | 0.327 | 0.537 |
| Phyllobacteriaceae                       | 0.23  | 0.63  | 0.03  | 0.05 | 0.919 | 0.919 |
| Rhizobiaceae                             | 0.00  | 0.01  | 0.00  | 0.01 | 0.550 | 0.648 |
| mitochondria                             | 0.03  | 0.04  | 0.02  | 0.03 | 0.698 | 0.731 |
| Sphingomonadaceae                        | 0.00  | 0.00  | 0.01  | 0.01 | 0.403 | 0.579 |
| Alcaligenaceae                           | 0.13  | 0.24  | 0.05  | 0.03 | 0.699 | 0.731 |
| Oxalobacteraceae                         | 0.01  | 0.01  | 0.01  | 0.01 | 0.387 | 0.574 |
| Desulfovibrionaceae                      | 0.48  | 0.39  | 0.19  | 0.16 | 0.054 | 0.158 |
| Helicobacteraceae                        | 13.60 | 11.89 | 7.57  | 3.53 | 0.441 | 0.580 |
| Enterobacteriaceae                       | 0.01  | 0.01  | 0.02  | 0.01 | 0.245 | 0.439 |
| F16                                      | 0.05  | 0.05  | 0.16  | 0.10 | 0.024 | 0.090 |
| Anaeroplasmataceae                       | 0.18  | 0.22  | 1.32  | 0.64 | 0.001 | 0.013 |
| Mycoplasmataceae                         | 0.01  | 0.01  | 0.40  | 0.51 | 0.015 | 0.076 |
| o__RF39;f__                              | 0.18  | 0.15  | 0.41  | 0.17 | 0.005 | 0.035 |
| Verrucomicrobiaceae                      | 0.03  | 0.02  | 2.56  | 4.63 | 0.083 | 0.211 |
| Genus                                    |       |       |       |      |       |       |
| Unassigned;Other;Other;Other;Other;Other | 0.15  | 0.03  | 0.19  | 0.03 | 0.048 | 0.129 |
| Bifidobacterium                          | 0.00  | 0.00  | 0.00  | 0.00 | 0.584 | 0.667 |
| Coriobacteriaceae;g__                    | 0.00  | 0.01  | 0.00  | 0.01 | 0.680 | 0.755 |
| Adlercreutzia                            | 0.09  | 0.07  | 0.05  | 0.01 | 0.247 | 0.367 |
| o__Bacteroidales;Other;Other             | 0.00  | 0.00  | 0.00  | 0.00 | 0.155 | 0.318 |
| o__Bacteroidales;f__;g__                 | 0.09  | 0.09  | 0.01  | 0.01 | 0.021 | 0.070 |
| Bacteroides                              | 2.41  | 3.09  | 4.04  | 1.69 | 0.068 | 0.170 |
| f__Prevotellaceae;g__                    | 0.01  | 0.01  | 0.00  | 0.00 | 0.007 | 0.033 |
| Prevotella                               | 0.00  | 0.00  | 0.07  | 0.10 | 0.166 | 0.318 |
| f__Rikenellaceae;g__                     | 3.67  | 2.38  | 4.25  | 1.91 | 0.564 | 0.661 |
| AF12                                     | 0.09  | 0.21  | 0.07  | 0.06 | 0.121 | 0.265 |
| Rikenella                                | 0.12  | 0.17  | 0.01  | 0.01 | 0.589 | 0.667 |
| ;f__S24-7;g__                            | 28.23 | 15.35 | 37.13 | 6.31 | 0.248 | 0.367 |
| Odoribacter                              | 4.45  | 4.34  | 5.59  | 2.07 | 0.211 | 0.359 |
| [Prevotella]                             | 2.69  | 3.03  | 0.01  | 0.01 | 0.001 | 0.006 |

|                              |       |      |       |      |       |       |
|------------------------------|-------|------|-------|------|-------|-------|
| Pedobacter                   | 0.00  | 0.01 | 0.01  | 0.02 | 0.159 | 0.318 |
| o__YS2;f__;g__               | 0.00  | 0.00 | 0.04  | 0.03 | 0.000 | 0.006 |
| o__Streptophyta;f__;g__      | 0.01  | 0.00 | 0.00  | 0.01 | 0.548 | 0.661 |
| Mucispirillum                | 0.00  | 0.00 | 0.00  | 0.00 | 0.246 | 0.367 |
| Enterococcus                 | 0.04  | 0.10 | 0.00  | 0.00 | 0.002 | 0.015 |
| Lactobacillus                | 2.40  | 2.66 | 2.64  | 1.23 | 0.178 | 0.318 |
| Streptococcus                | 0.03  | 0.02 | 0.01  | 0.00 | 0.011 | 0.049 |
| Turicibacter                 | 1.15  | 3.13 | 0.02  | 0.01 | 0.033 | 0.100 |
| o__Clostridiales;Other;Other | 0.68  | 1.46 | 0.04  | 0.02 | 0.434 | 0.577 |
| o__Clostridiales;f__;g__     | 22.93 | 7.48 | 19.72 | 3.24 | 0.441 | 0.577 |
| f__Christensenellaceae;g__   | 0.01  | 0.01 | 0.00  | 0.00 | 0.017 | 0.066 |
| f__Clostridiaceae;g__        | 0.09  | 0.08 | 0.04  | 0.02 | 0.162 | 0.318 |
| Candidatus Arthromitus       | 0.10  | 0.13 | 0.01  | 0.01 | 0.091 | 0.208 |
| Clostridium                  | 0.11  | 0.16 | 0.08  | 0.07 | 0.441 | 0.577 |
| SMB53                        | 0.00  | 0.01 | 0.00  | 0.00 | 0.038 | 0.109 |
| Dehalobacterium              | 0.18  | 0.08 | 0.23  | 0.07 | 0.229 | 0.367 |
| f__Lachnospiraceae;Other     | 0.23  | 0.18 | 0.13  | 0.05 | 0.564 | 0.661 |
| f__Lachnospiraceae;g__       | 7.56  | 5.75 | 6.30  | 4.08 | 1.000 | 1.000 |
| Anaerostipes                 | 0.01  | 0.01 | 0.16  | 0.09 | 0.001 | 0.006 |
| Coprococcus                  | 0.52  | 0.29 | 0.53  | 0.21 | 0.847 | 0.900 |
| Dorea                        | 0.09  | 0.04 | 0.02  | 0.01 | 0.002 | 0.015 |
| Roseburia                    | 0.00  | 0.00 | 0.10  | 0.09 | 0.001 | 0.006 |
| [Ruminococcus]               | 1.15  | 0.56 | 0.39  | 0.10 | 0.004 | 0.022 |
| f__Peptococcaceae;g__        | 0.04  | 0.05 | 0.02  | 0.01 | 0.885 | 0.926 |
| f__Peptostreptococcaceae;g__ | 0.03  | 0.06 | 0.00  | 0.00 | 0.018 | 0.066 |
| f__Ruminococcaceae;Other     | 0.01  | 0.01 | 0.01  | 0.01 | 0.261 | 0.378 |
| f__Ruminococcaceae;g__       | 1.76  | 0.49 | 1.42  | 0.21 | 0.178 | 0.318 |
| g__Oscillospira              | 2.13  | 0.76 | 2.36  | 0.46 | 0.564 | 0.661 |
| ;g__Ruminococcus             | 1.46  | 0.79 | 1.23  | 0.95 | 0.441 | 0.577 |
| f__[Mogibacteriaceae];g__    | 0.06  | 0.04 | 0.01  | 0.01 | 0.002 | 0.013 |
| f__Erysipelotrichaceae;g__   | 0.11  | 0.06 | 0.08  | 0.04 | 0.563 | 0.661 |
| Allobaculum                  | 0.06  | 0.07 | 0.01  | 0.01 | 0.243 | 0.367 |
| Coprobacillus                | 0.04  | 0.05 | 0.01  | 0.00 | 0.056 | 0.146 |
| o__RF32;f__;g__              | 0.00  | 0.00 | 0.14  | 0.14 | 0.000 | 0.006 |
| Phyllobacterium              | 0.23  | 0.63 | 0.03  | 0.05 | 0.919 | 0.947 |
| f__mitochondria;Other        | 0.03  | 0.04 | 0.02  | 0.03 | 0.698 | 0.755 |
| Sphingomonas                 | 0.00  | 0.00 | 0.00  | 0.00 | 0.957 | 0.971 |
| Sutterella                   | 0.13  | 0.24 | 0.05  | 0.03 | 0.699 | 0.755 |
| f__Oxalobacteraceae;Other    | 0.00  | 0.00 | 0.01  | 0.01 | 0.208 | 0.359 |
| Desulfovibrionaceae;Other    | 0.34  | 0.31 | 0.02  | 0.01 | 0.001 | 0.006 |
| f__Desulfovibrionaceae;g__   | 0.00  | 0.00 | 0.03  | 0.03 | 0.019 | 0.066 |
| Bilophila                    | 0.01  | 0.01 | 0.00  | 0.00 | 0.168 | 0.318 |
| Desulfovibrio                | 0.13  | 0.25 | 0.14  | 0.15 | 0.092 | 0.208 |
| f__Helicobacteraceae;Other   | 0.00  | 0.00 | 0.00  | 0.00 | 0.359 | 0.508 |
| f__Helicobacteraceae;g__     | 0.13  | 0.07 | 2.72  | 1.19 | 0.001 | 0.006 |
| Flexispira                   | 5.72  | 5.02 | 0.10  | 0.05 | 0.038 | 0.109 |
| Helicobacter                 | 7.75  | 6.81 | 4.75  | 3.91 | 0.500 | 0.642 |
| f__Enterobacteriaceae;g__    | 0.01  | 0.01 | 0.02  | 0.01 | 0.225 | 0.367 |
| f__F16;g__                   | 0.05  | 0.05 | 0.16  | 0.10 | 0.024 | 0.076 |
| Anaeroplasma                 | 0.18  | 0.22 | 1.32  | 0.64 | 0.001 | 0.009 |
| Mycoplasma                   | 0.01  | 0.01 | 0.40  | 0.51 | 0.015 | 0.063 |
| o__RF39;f__;g__              | 0.18  | 0.15 | 0.41  | 0.17 | 0.005 | 0.028 |
| Akkermansia                  | 0.03  | 0.02 | 2.56  | 4.63 | 0.083 | 0.201 |

**Supplementary Table S2. Differences in bacterial taxa in 24 weeks-old wt mice treated or not treated with SLAB51**

| Taxa                  | not treated |       | treated SLAB51 |       | p-value | q-value |
|-----------------------|-------------|-------|----------------|-------|---------|---------|
|                       | mean        | SD    | mean           | SD    |         |         |
| <b>Phylum</b>         |             |       |                |       |         |         |
| Actinobacteria        | 0.06        | 18.28 | 0.34           | 0.33  | 0.058   | 0.146   |
| Bacteroidetes         | 51.20       | 18.95 | 53.13          | 10.18 | 0.401   | 0.573   |
| Cyanobacteria         | 0.05        | 12.46 | 0.02           | 0.02  | 0.018   | 0.059   |
| Deferribacteres       | 0.00        | 13.12 | 0.06           | 0.13  | 0.002   | 0.012   |
| Firmicutes            | 35.58       | 13.84 | 36.17          | 4.81  | 0.834   | 0.926   |
| Proteobacteria        | 8.07        | 4.10  | 9.32           | 8.21  | 1.000   | 1.000   |
| TM7                   | 0.16        | 2.79  | 0.15           | 0.14  | 0.636   | 0.795   |
| Tenericutes           | 2.13        | 3.20  | 0.59           | 0.55  | 0.002   | 0.012   |
| Verrucomicrobia       | 2.56        | 4.63  | 0.05           | 0.05  | 0.399   | 0.573   |
| <b>Class</b>          |             |       |                |       |         |         |
| Actinobacteria        | 0.00        | 0.00  | 0.25           | 0.29  | 0.040   | 0.094   |
| Coriobacteriia        | 0.06        | 0.01  | 0.09           | 0.06  | 0.342   | 0.508   |
| Bacteroidia           | 51.19       | 7.27  | 53.12          | 10.18 | 0.401   | 0.508   |
| Sphingobacteriia      | 0.02        | 0.02  | 0.01           | 0.02  | 0.913   | 0.913   |
| 4C0d-2                | 0.04        | 0.03  | 0.01           | 0.01  | 0.017   | 0.054   |
| Chloroplast           | 0.01        | 0.00  | 0.01           | 0.01  | 0.785   | 0.829   |
| Deferribacteres       | 0.00        | 0.00  | 0.06           | 0.13  | 0.002   | 0.011   |
| Bacilli               | 2.67        | 1.23  | 4.35           | 3.05  | 0.172   | 0.364   |
| Clostridia            | 32.82       | 5.78  | 30.89          | 3.69  | 0.401   | 0.508   |
| Erysipelotrichi       | 0.10        | 0.04  | 0.93           | 0.98  | 0.036   | 0.094   |
| Alphaproteobacteria   | 0.21        | 0.17  | 0.18           | 0.14  | 0.674   | 0.754   |
| Betaproteobacteria    | 0.07        | 0.04  | 0.68           | 0.61  | 0.005   | 0.017   |
| Deltaproteobacteria   | 0.19        | 0.16  | 1.70           | 1.33  | 0.001   | 0.011   |
| Epsilonproteobacteria | 7.57        | 3.53  | 6.64           | 7.61  | 0.248   | 0.471   |
| Gammaproteobacteria   | 0.03        | 0.01  | 0.12           | 0.06  | 0.002   | 0.011   |
| TM7-3                 | 0.16        | 0.10  | 0.15           | 0.14  | 0.636   | 0.754   |
| Mollicutes            | 2.13        | 0.60  | 0.59           | 0.55  | 0.002   | 0.011   |
| Verrucomicrobiae      | 2.56        | 4.63  | 0.05           | 0.05  | 0.399   | 0.508   |
| <b>Order</b>          |             |       |                |       |         |         |
| Bifidobacteriales     | 0.00        | 0.00  | 0.25           | 0.29  | 0.018   | 0.052   |
| Coriobacteriales      | 0.06        | 0.01  | 0.09           | 0.06  | 0.342   | 0.548   |
| Bacteroidales         | 51.19       | 7.27  | 53.12          | 10.18 | 0.401   | 0.548   |
| Sphingobacteriales    | 0.02        | 0.02  | 0.01           | 0.02  | 0.913   | 0.916   |
| YS2                   | 0.04        | 0.03  | 0.01           | 0.01  | 0.017   | 0.052   |
| Streptophyta          | 0.00        | 0.01  | 0.01           | 0.01  | 0.585   | 0.737   |
| Deferribacteriales    | 0.00        | 0.00  | 0.06           | 0.13  | 0.002   | 0.020   |
| Lactobacillales       | 2.64        | 1.23  | 2.82           | 1.78  | 0.916   | 0.916   |
| Turicibacteriales     | 0.02        | 0.01  | 1.52           | 1.97  | 0.023   | 0.060   |
| Clostridiales         | 32.82       | 5.78  | 30.89          | 3.69  | 0.401   | 0.548   |
| Erysipelotrichales    | 0.10        | 0.04  | 0.93           | 0.98  | 0.036   | 0.084   |
| RF32                  | 0.14        | 0.14  | 0.04           | 0.03  | 0.058   | 0.126   |
| Rhizobiales           | 0.03        | 0.05  | 0.08           | 0.12  | 0.597   | 0.737   |
| Rickettsiales         | 0.02        | 0.03  | 0.04           | 0.04  | 0.290   | 0.504   |
| Sphingomonadales      | 0.01        | 0.01  | 0.01           | 0.01  | 0.652   | 0.737   |
| Burkholderiales       | 0.07        | 0.04  | 0.68           | 0.61  | 0.005   | 0.023   |
| Desulfovibrionales    | 0.19        | 0.16  | 1.70           | 1.33  | 0.001   | 0.020   |
| Campylobacteriales    | 7.57        | 3.53  | 6.64           | 7.61  | 0.248   | 0.496   |

|                    |      |      |      |      |       |       |
|--------------------|------|------|------|------|-------|-------|
| Enterobacteriales  | 0.02 | 0.01 | 0.10 | 0.05 | 0.002 | 0.020 |
| Pseudomonadales    | 0.00 | 0.00 | 0.01 | 0.01 | 0.011 | 0.049 |
| CW040              | 0.16 | 0.10 | 0.15 | 0.14 | 0.636 | 0.737 |
| Anaeroplasmatales  | 1.32 | 0.64 | 0.24 | 0.46 | 0.003 | 0.021 |
| Mycoplasmatales    | 0.40 | 0.51 | 0.13 | 0.07 | 0.916 | 0.916 |
| RF39               | 0.41 | 0.17 | 0.22 | 0.20 | 0.014 | 0.050 |
| Verrucomicrobiales | 2.56 | 4.63 | 0.05 | 0.05 | 0.399 | 0.548 |

#### Family

|                        |       |      |       |      |       |       |
|------------------------|-------|------|-------|------|-------|-------|
| Bifidobacteriaceae     | 0.00  | 0.00 | 0.25  | 0.29 | 0.018 | 0.059 |
| Coriobacteriaceae      | 0.06  | 0.01 | 0.09  | 0.06 | 0.342 | 0.466 |
| o__Bacteroidales;f__   | 0.01  | 0.01 | 0.73  | 0.48 | 0.001 | 0.012 |
| Bacteroidaceae         | 4.04  | 1.69 | 4.28  | 1.21 | 0.834 | 0.852 |
| Porphyromonadaceae     | 0.00  | 0.00 | 0.00  | 0.00 | 0.511 | 0.618 |
| Prevotellaceae         | 0.07  | 0.10 | 0.00  | 0.00 | 0.128 | 0.246 |
| Rikenellaceae          | 4.33  | 1.91 | 2.16  | 0.79 | 0.021 | 0.064 |
| S24-7                  | 37.13 | 6.31 | 39.93 | 8.46 | 0.462 | 0.591 |
| [Odoribacteraceae]     | 5.59  | 2.07 | 6.00  | 2.01 | 0.713 | 0.763 |
| [Paraprevotellaceae]   | 0.01  | 0.01 | 0.01  | 0.01 | 0.318 | 0.458 |
| o__YS2;f__             | 0.04  | 0.03 | 0.01  | 0.01 | 0.017 | 0.059 |
| o__Streptophyta;f__    | 0.00  | 0.01 | 0.01  | 0.01 | 0.585 | 0.690 |
| Deferribacteraceae     | 0.00  | 0.00 | 0.06  | 0.13 | 0.002 | 0.018 |
| Lactobacillaceae       | 2.64  | 1.23 | 2.72  | 1.72 | 0.674 | 0.739 |
| Streptococcaceae       | 0.01  | 0.00 | 0.10  | 0.08 | 0.001 | 0.012 |
| Turicibacteraceae      | 0.02  | 0.01 | 1.52  | 1.97 | 0.023 | 0.067 |
| o__Clostridiales;Other | 0.04  | 0.02 | 0.02  | 0.01 | 0.008 | 0.039 |
| o__Clostridiales;f__   | 19.72 | 3.24 | 16.45 | 2.88 | 0.074 | 0.155 |
| Christensenellaceae    | 0.00  | 0.00 | 0.01  | 0.01 | 0.034 | 0.086 |
| Clostridiaceae         | 0.13  | 0.08 | 0.36  | 0.14 | 0.016 | 0.059 |
| Dehalobacteriaceae     | 0.23  | 0.07 | 0.31  | 0.12 | 0.141 | 0.250 |
| Lachnospiraceae        | 7.64  | 4.16 | 7.42  | 1.85 | 0.345 | 0.466 |
| Peptococcaceae         | 0.02  | 0.01 | 0.04  | 0.02 | 0.066 | 0.143 |
| Ruminococcaceae        | 5.02  | 1.12 | 6.26  | 2.21 | 0.142 | 0.250 |
| [Mogibacteriaceae]     | 0.01  | 0.01 | 0.03  | 0.01 | 0.008 | 0.039 |
| Erysipelotrichaceae    | 0.10  | 0.04 | 0.93  | 0.98 | 0.036 | 0.086 |
| RF32;f__               | 0.14  | 0.14 | 0.04  | 0.03 | 0.058 | 0.134 |
| Methylobacteriaceae    | 0.00  | 0.00 | 0.00  | 0.00 | 0.107 | 0.213 |
| Phyllobacteriaceae     | 0.03  | 0.05 | 0.08  | 0.12 | 0.285 | 0.432 |
| Rhizobiaceae           | 0.00  | 0.01 | 0.01  | 0.01 | 0.499 | 0.618 |
| mitochondria           | 0.02  | 0.03 | 0.04  | 0.04 | 0.290 | 0.432 |
| Sphingomonadaceae      | 0.01  | 0.01 | 0.01  | 0.01 | 0.652 | 0.732 |
| Alcaligenaceae         | 0.05  | 0.03 | 0.66  | 0.61 | 0.008 | 0.039 |
| Comamonadaceae         | 0.00  | 0.00 | 0.01  | 0.01 | 0.002 | 0.018 |
| Oxalobacteraceae       | 0.01  | 0.01 | 0.01  | 0.01 | 0.748 | 0.782 |
| Desulfovibrionaceae    | 0.19  | 0.16 | 1.70  | 1.33 | 0.001 | 0.012 |
| Helicobacteraceae      | 7.57  | 3.53 | 6.64  | 7.61 | 0.248 | 0.407 |
| Enterobacteriaceae     | 0.02  | 0.01 | 0.10  | 0.05 | 0.002 | 0.018 |
| Moraxellaceae          | 0.00  | 0.00 | 0.01  | 0.01 | 0.031 | 0.083 |
| Pseudomonadaceae       | 0.00  | 0.00 | 0.01  | 0.01 | 0.244 | 0.407 |
| F16                    | 0.16  | 0.10 | 0.15  | 0.14 | 0.636 | 0.732 |
| Anaeroplasmataceae     | 1.32  | 0.64 | 0.24  | 0.46 | 0.003 | 0.022 |
| Mycoplasmataceae       | 0.40  | 0.51 | 0.13  | 0.07 | 0.916 | 0.916 |
| o__RF39;f__            | 0.41  | 0.17 | 0.22  | 0.20 | 0.014 | 0.056 |
| Verrucomicrobiaceae    | 2.56  | 4.63 | 0.05  | 0.05 | 0.399 | 0.525 |

**Genus**

|                              |       |      |       |      |       |       |
|------------------------------|-------|------|-------|------|-------|-------|
| Bifidobacterium              | 0.00  | 0.00 | 0.25  | 0.29 | 0.018 | 0.062 |
| Coriobacteriaceae;g__        | 0.00  | 0.01 | 0.01  | 0.01 | 0.513 | 0.643 |
| Adlercreutzia                | 0.05  | 0.01 | 0.08  | 0.06 | 0.342 | 0.505 |
| o__Bacteroidales;Other;Other | 0.01  | 0.01 | 0.73  | 0.48 | 0.001 | 0.014 |
| Bacteroides                  | 4.04  | 1.69 | 4.28  | 1.21 | 0.834 | 0.858 |
| Parabacteroides              | 0.00  | 0.00 | 0.00  | 0.00 | 0.511 | 0.643 |
| Prevotella                   | 0.07  | 0.10 | 0.00  | 0.00 | 0.128 | 0.239 |
| f__Rikenellaceae;g__         | 4.25  | 1.91 | 1.78  | 0.63 | 0.005 | 0.024 |
| AF12                         | 0.07  | 0.06 | 0.22  | 0.09 | 0.004 | 0.024 |
| Rikenella                    | 0.01  | 0.01 | 0.17  | 0.31 | 0.026 | 0.077 |
| ;f__S24-7;g__                | 37.13 | 6.31 | 39.93 | 8.46 | 0.462 | 0.613 |
| Odoribacter                  | 5.59  | 2.07 | 6.00  | 2.01 | 0.713 | 0.781 |
| [Prevotella]                 | 0.01  | 0.01 | 0.01  | 0.01 | 0.318 | 0.488 |
| Pedobacter                   | 0.01  | 0.02 | 0.01  | 0.01 | 0.822 | 0.858 |
| o__YS2;f__;g__               | 0.04  | 0.03 | 0.01  | 0.01 | 0.017 | 0.062 |
| o__Streptophyta;f__;g__      | 0.00  | 0.01 | 0.01  | 0.01 | 0.585 | 0.696 |
| Mucispirillum                | 0.00  | 0.00 | 0.06  | 0.13 | 0.002 | 0.023 |
| Lactobacillaceae;g__         | 0.00  | 0.00 | 0.00  | 0.00 | 0.027 | 0.077 |
| Lactobacillus                | 2.64  | 1.23 | 2.72  | 1.72 | 0.674 | 0.751 |
| Streptococcus                | 0.01  | 0.00 | 0.10  | 0.08 | 0.001 | 0.014 |
| Turicibacter                 | 0.02  | 0.01 | 1.52  | 1.97 | 0.023 | 0.073 |
| o__Clostridiales;Other;Other | 0.04  | 0.02 | 0.02  | 0.01 | 0.008 | 0.036 |
| o__Clostridiales;f__;g__     | 19.72 | 3.24 | 16.45 | 2.88 | 0.074 | 0.165 |
| f__Christensenellaceae;g__   | 0.00  | 0.00 | 0.01  | 0.01 | 0.011 | 0.043 |
| f__Clostridiaceae;g__        | 0.04  | 0.02 | 0.08  | 0.07 | 0.317 | 0.488 |
| Candidatus Arthromitus       | 0.01  | 0.01 | 0.05  | 0.05 | 0.051 | 0.130 |
| Clostridium                  | 0.08  | 0.07 | 0.23  | 0.18 | 0.172 | 0.304 |
| Dehalobacterium              | 0.23  | 0.07 | 0.31  | 0.12 | 0.141 | 0.256 |
| f__Lachnospiraceae;Other     | 0.13  | 0.05 | 0.10  | 0.05 | 0.344 | 0.505 |
| f__Lachnospiraceae;g__       | 6.30  | 4.08 | 5.35  | 1.87 | 0.916 | 0.916 |
| Anaerostipes                 | 0.16  | 0.09 | 0.07  | 0.09 | 0.059 | 0.140 |
| Coprococcus                  | 0.53  | 0.21 | 1.02  | 0.29 | 0.002 | 0.023 |
| Dorea                        | 0.02  | 0.01 | 0.11  | 0.08 | 0.005 | 0.024 |
| Roseburia                    | 0.10  | 0.09 | 0.11  | 0.20 | 0.090 | 0.194 |
| [Ruminococcus]               | 0.39  | 0.10 | 0.66  | 0.34 | 0.021 | 0.068 |
| f__Peptococcaceae;g__        | 0.02  | 0.01 | 0.04  | 0.02 | 0.066 | 0.151 |
| f__Ruminococcaceae;Other     | 0.01  | 0.01 | 0.01  | 0.00 | 0.746 | 0.799 |
| f__Ruminococcaceae;g__       | 1.42  | 0.21 | 2.25  | 2.15 | 0.529 | 0.651 |
| Oscillospira                 | 2.36  | 0.46 | 2.82  | 1.10 | 0.401 | 0.553 |
| Ruminococcus                 | 1.23  | 0.95 | 1.18  | 0.52 | 0.600 | 0.701 |
| f__[Mogibacteriaceae];g__    | 0.01  | 0.01 | 0.03  | 0.01 | 0.008 | 0.036 |
| f__Erysipelotrichaceae;g__   | 0.08  | 0.04 | 0.19  | 0.12 | 0.103 | 0.209 |
| Allobaculum                  | 0.01  | 0.01 | 0.72  | 0.84 | 0.045 | 0.119 |
| Coprobacillus                | 0.01  | 0.00 | 0.02  | 0.03 | 0.554 | 0.671 |
| _RF32;f__;g__                | 0.14  | 0.14 | 0.04  | 0.03 | 0.058 | 0.140 |
| Methylobacterium             | 0.00  | 0.00 | 0.00  | 0.00 | 0.117 | 0.225 |
| Phyllobacterium              | 0.03  | 0.05 | 0.08  | 0.12 | 0.285 | 0.467 |
| f__mitochondria;Other        | 0.02  | 0.03 | 0.04  | 0.04 | 0.290 | 0.467 |
| Sutterella                   | 0.05  | 0.03 | 0.66  | 0.61 | 0.008 | 0.036 |
| Comamonadaceae;g__           | 0.00  | 0.00 | 0.01  | 0.01 | 0.003 | 0.024 |
| f__Desulfovibrionaceae;g__   | 0.00  | 0.00 | 0.00  | 0.00 | 0.117 | 0.225 |
| Bilophila                    | 0.01  | 0.01 | 0.00  | 0.01 | 0.397 | 0.553 |

|                            |      |      |      |      |       |       |
|----------------------------|------|------|------|------|-------|-------|
| Oxalobacteraceae;g__       | 0.01 | 0.01 | 0.01 | 0.01 | 0.612 | 0.704 |
| Desulfovibrionaceae;Other  | 0.02 | 0.01 | 0.01 | 0.01 | 0.424 | 0.574 |
| Desulfovibrionaceae;g__    | 0.03 | 0.03 | 1.59 | 1.35 | 0.001 | 0.014 |
| Desulfovibrio              | 0.14 | 0.15 | 0.10 | 0.07 | 0.493 | 0.642 |
| f__Helicobacteraceae;Other | 0.00 | 0.00 | 0.00 | 0.00 | 0.095 | 0.199 |
| f__Helicobacteraceae;g__   | 2.72 | 1.19 | 3.75 | 3.95 | 0.753 | 0.799 |
| Flexispira                 | 0.10 | 0.05 | 2.76 | 3.74 | 0.001 | 0.014 |
| Helicobacter               | 4.75 | 3.91 | 0.14 | 0.13 | 0.005 | 0.024 |
| f__Enterobacteriaceae;g__  | 0.02 | 0.01 | 0.10 | 0.05 | 0.002 | 0.023 |
| Acinetobacter              | 0.00 | 0.00 | 0.01 | 0.01 | 0.031 | 0.084 |
| Pseudomonas                | 0.00 | 0.00 | 0.01 | 0.01 | 0.244 | 0.421 |
| f__F16;g__                 | 0.16 | 0.10 | 0.15 | 0.14 | 0.636 | 0.720 |
| Anaeroplasma               | 1.32 | 0.64 | 0.24 | 0.46 | 0.003 | 0.024 |
| Mycoplasma                 | 0.40 | 0.51 | 0.13 | 0.07 | 0.916 | 0.916 |
| o__RF39;f__;g__            | 0.41 | 0.17 | 0.22 | 0.20 | 0.014 | 0.052 |
| Akkermansia                | 2.56 | 4.63 | 0.05 | 0.05 | 0.399 | 0.553 |

**Supplementary Table S3. Differences in bacterial taxa in 24 weeks-old 3xTg-AD mice treated or not treated with SLAB51**

| Taxa                  | not treated |       | treated SLAB51 |       | p-value | q-value |
|-----------------------|-------------|-------|----------------|-------|---------|---------|
|                       | mean        | SD    | mean           | SD    |         |         |
| <b>Phylum</b>         |             |       |                |       |         |         |
| Actinobacteria        | 0.10        | 0.07  | 0.08           | 0.05  | 0.624   | 0.780   |
| Bacteroidetes         | 41.78       | 16.82 | 60.46          | 13.92 | 0.028   | 0.138   |
| Cyanobacteria         | 0.01        | 0.00  | 0.01           | 0.02  | 0.134   | 0.446   |
| Deferribacteres       | 0.00        | 0.00  | 0.02           | 0.06  | 0.563   | 0.780   |
| Firmicutes            | 42.99       | 15.25 | 36.93          | 13.55 | 0.568   | 0.780   |
| Proteobacteria        | 14.52       | 11.52 | 1.86           | 0.94  | 0.028   | 0.138   |
| TM7                   | 0.05        | 0.05  | 0.04           | 0.04  | 0.219   | 0.548   |
| Tenericutes           | 0.37        | 0.25  | 0.42           | 0.18  | 0.462   | 0.780   |
| Verrucomicrobia       | 0.03        | 0.02  | 0.03           | 0.02  | 0.934   | 0.934   |
| <b>Class</b>          |             |       |                |       |         |         |
| Actinobacteria        | 0.00        | 0.00  | 0.03           | 0.04  | 0.030   | 0.074   |
| Coriobacteriia        | 0.10        | 0.07  | 0.05           | 0.03  | 0.191   | 0.375   |
| Bacteroidia           | 41.77       | 16.82 | 60.45          | 13.92 | 0.028   | 0.074   |
| 4C0d-2                | 0.00        | 0.00  | 0.01           | 0.02  | 0.897   | 0.934   |
| Chloroplast           | 0.01        | 0.00  | 0.00           | 0.00  | 0.007   | 0.042   |
| Bacilli               | 3.63        | 5.57  | 5.49           | 7.64  | 0.744   | 0.903   |
| Clostridia            | 39.16       | 14.36 | 31.12          | 13.34 | 0.221   | 0.375   |
| Erysipelotrichi       | 0.20        | 0.14  | 0.31           | 0.23  | 0.438   | 0.655   |
| Alphaproteobacteria   | 0.27        | 0.67  | 0.02           | 0.02  | 0.017   | 0.066   |
| Betaproteobacteria    | 0.14        | 0.24  | 1.20           | 0.97  | 0.003   | 0.021   |
| Deltaproteobacteria   | 0.48        | 0.39  | 0.39           | 0.35  | 0.653   | 0.854   |
| Epsilonproteobacteria | 13.60       | 11.89 | 0.13           | 0.11  | 0.003   | 0.021   |
| Gammaproteobacteria   | 0.02        | 0.02  | 0.12           | 0.12  | 0.019   | 0.066   |
| TM7-3                 | 0.05        | 0.05  | 0.04           | 0.04  | 0.219   | 0.375   |
| Mollicutes            | 0.37        | 0.25  | 0.42           | 0.18  | 0.462   | 0.655   |
| Verrucomicrobiae      | 0.03        | 0.02  | 0.03           | 0.02  | 0.934   | 0.934   |



**Order**

|                    |       |       |       |       |       |       |
|--------------------|-------|-------|-------|-------|-------|-------|
| Bifidobacteriales  | 0.00  | 0.00  | 0.03  | 0.04  | 0.038 | 0.123 |
| Coriobacteriales   | 0.10  | 0.07  | 0.05  | 0.03  | 0.191 | 0.383 |
| Bacteroidales      | 41.77 | 16.82 | 60.45 | 13.92 | 0.028 | 0.102 |
| YS2                | 0.00  | 0.00  | 0.01  | 0.02  | 0.758 | 0.934 |
| Streptophyta       | 0.01  | 0.00  | 0.00  | 0.00  | 0.007 | 0.048 |
| Bacillales         | 0.00  | 0.01  | 0.00  | 0.00  | 0.086 | 0.223 |
| Lactobacillales    | 2.47  | 2.65  | 5.47  | 7.64  | 0.903 | 0.934 |
| Turicibacterales   | 1.15  | 3.13  | 0.02  | 0.01  | 0.019 | 0.081 |
| Clostridiales      | 39.16 | 14.36 | 31.12 | 13.34 | 0.221 | 0.383 |
| Erysipelotrichales | 0.20  | 0.14  | 0.31  | 0.23  | 0.438 | 0.711 |
| Rhizobiales        | 0.23  | 0.63  | 0.01  | 0.01  | 0.113 | 0.266 |
| Rickettsiales      | 0.03  | 0.04  | 0.01  | 0.01  | 0.047 | 0.137 |
| Sphingomonadales   | 0.00  | 0.00  | 0.00  | 0.00  | 0.647 | 0.888 |
| Burkholderiales    | 0.14  | 0.24  | 1.20  | 0.97  | 0.003 | 0.022 |
| Desulfovibrionales | 0.48  | 0.39  | 0.39  | 0.35  | 0.683 | 0.888 |
| Campylobacteriales | 13.60 | 11.89 | 0.13  | 0.11  | 0.003 | 0.022 |
| Aeromonadales      | 0.00  | 0.00  | 0.04  | 0.07  | 0.000 | 0.005 |
| Enterobacteriales  | 0.01  | 0.01  | 0.07  | 0.07  | 0.010 | 0.051 |
| Pseudomonadales    | 0.00  | 0.00  | 0.00  | 0.01  | 0.532 | 0.814 |
| Xanthomonadales    | 0.00  | 0.01  | 0.00  | 0.01  | 0.855 | 0.934 |
| CW040              | 0.05  | 0.05  | 0.04  | 0.04  | 0.219 | 0.383 |
| Anaeroplasmatales  | 0.18  | 0.22  | 0.14  | 0.14  | 0.683 | 0.888 |
| Mycoplasmatales    | 0.01  | 0.01  | 0.01  | 0.01  | 0.798 | 0.934 |
| RF39               | 0.18  | 0.15  | 0.28  | 0.19  | 0.221 | 0.383 |
| Verrucomicrobiales | 0.03  | 0.02  | 0.03  | 0.02  | 0.934 | 0.934 |

**Family**

|                        |       |       |       |       |       |       |
|------------------------|-------|-------|-------|-------|-------|-------|
| Bifidobacteriaceae     | 0.00  | 0.00  | 0.03  | 0.04  | 0.038 | 0.227 |
| Coriobacteriaceae      | 0.10  | 0.07  | 0.05  | 0.03  | 0.191 | 0.441 |
| o__Bacteroidales;Other | 0.00  | 0.00  | 0.00  | 0.00  | 0.179 | 0.441 |
| ;o__Bacteroidales;f__  | 0.09  | 0.09  | 0.45  | 0.70  | 0.540 | 0.756 |
| Bacteroidaceae         | 2.41  | 3.09  | 3.70  | 2.16  | 0.191 | 0.441 |
| Prevotellaceae         | 0.01  | 0.01  | 0.25  | 0.40  | 0.435 | 0.691 |
| Rikenellaceae          | 3.88  | 2.51  | 5.75  | 4.94  | 0.514 | 0.744 |
| S24-7                  | 28.23 | 15.35 | 42.38 | 15.40 | 0.060 | 0.254 |
| [Odoribacteraceae]     | 4.45  | 4.34  | 5.63  | 2.35  | 0.191 | 0.441 |
| [Paraprevotellaceae]   | 2.69  | 3.03  | 1.82  | 2.82  | 0.086 | 0.301 |
| o__YS2;f__             | 0.00  | 0.00  | 0.01  | 0.02  | 0.758 | 0.885 |
| o__Streptophyta;f__    | 0.01  | 0.00  | 0.00  | 0.00  | 0.007 | 0.078 |
| Enterococcaceae        | 0.04  | 0.10  | 0.00  | 0.00  | 0.051 | 0.245 |
| Lactobacillaceae       | 2.40  | 2.66  | 5.45  | 7.64  | 1.000 | 1.000 |
| Streptococcaceae       | 0.03  | 0.02  | 0.02  | 0.03  | 0.342 | 0.625 |
| Turicibacteraceae      | 1.15  | 3.13  | 0.02  | 0.01  | 0.019 | 0.130 |
| o__Clostridiales;Other | 0.68  | 1.46  | 0.36  | 0.56  | 0.461 | 0.691 |
| o__Clostridiales;f__   | 22.93 | 7.48  | 18.90 | 7.53  | 0.568 | 0.769 |
| Christensenellaceae    | 0.01  | 0.01  | 0.01  | 0.01  | 0.376 | 0.658 |
| Clostridiaceae         | 0.31  | 0.29  | 0.27  | 0.14  | 0.935 | 0.958 |
| Dehalobacteriaceae     | 0.18  | 0.08  | 0.15  | 0.07  | 0.307 | 0.585 |
| Lachnospiraceae        | 9.56  | 6.29  | 5.68  | 3.92  | 0.103 | 0.331 |
| Peptococcaceae         | 0.04  | 0.05  | 0.04  | 0.06  | 0.682 | 0.819 |
| Peptostreptococcaceae  | 0.03  | 0.06  | 0.00  | 0.00  | 0.068 | 0.260 |
| Ruminococcaceae        | 5.37  | 1.65  | 5.68  | 2.67  | 0.870 | 0.937 |

|                              |       |       |       |       |       |       |
|------------------------------|-------|-------|-------|-------|-------|-------|
| [Mogibacteriaceae]           | 0.06  | 0.04  | 0.03  | 0.02  | 0.152 | 0.441 |
| Erysipelotrichaceae          | 0.20  | 0.14  | 0.31  | 0.23  | 0.438 | 0.691 |
| Phyllobacteriaceae           | 0.23  | 0.63  | 0.00  | 0.00  | 0.202 | 0.441 |
| mitochondria                 | 0.03  | 0.04  | 0.01  | 0.01  | 0.052 | 0.245 |
| Sphingomonadaceae            | 0.00  | 0.00  | 0.00  | 0.00  | 0.647 | 0.819 |
| Alcaligenaceae               | 0.13  | 0.24  | 1.19  | 0.97  | 0.002 | 0.035 |
| Oxalobacteraceae             | 0.01  | 0.01  | 0.00  | 0.00  | 0.450 | 0.691 |
| Desulfovibrionaceae          | 0.48  | 0.39  | 0.39  | 0.35  | 0.683 | 0.819 |
| Helicobacteraceae            | 13.60 | 11.89 | 0.13  | 0.11  | 0.003 | 0.035 |
| Aeromonadaceae               | 0.00  | 0.00  | 0.04  | 0.07  | 0.000 | 0.008 |
| Enterobacteriaceae           | 0.01  | 0.01  | 0.07  | 0.07  | 0.010 | 0.082 |
| F16                          | 0.05  | 0.05  | 0.04  | 0.04  | 0.219 | 0.441 |
| Anaeroplasmataceae           | 0.18  | 0.22  | 0.14  | 0.14  | 0.683 | 0.819 |
| Mycoplasmataceae             | 0.01  | 0.01  | 0.01  | 0.01  | 0.798 | 0.906 |
| o_RF39;f__                   | 0.18  | 0.15  | 0.28  | 0.19  | 0.221 | 0.441 |
| Verrucomicrobiaceae          | 0.03  | 0.02  | 0.03  | 0.02  | 0.934 | 0.958 |
| <b>Genus</b>                 |       |       |       |       |       |       |
| Bifidobacterium              | 0.00  | 0.00  | 0.03  | 0.04  | 0.038 | 0.151 |
| Coriobacteriaceae;g__        | 0.00  | 0.01  | 0.01  | 0.02  | 0.233 | 0.415 |
| Adlercreutzia                | 0.09  | 0.07  | 0.04  | 0.03  | 0.130 | 0.347 |
| o__Bacteroidales;Other;Other | 0.00  | 0.00  | 0.00  | 0.00  | 0.179 | 0.395 |
| o__Bacteroidales;f__;g__     | 0.09  | 0.09  | 0.45  | 0.70  | 0.540 | 0.720 |
| Bacteroides                  | 2.41  | 3.09  | 3.70  | 2.16  | 0.191 | 0.395 |
| f__Prevotellaceae;g__        | 0.01  | 0.01  | 0.01  | 0.02  | 0.523 | 0.713 |
| Prevotella                   | 0.00  | 0.00  | 0.24  | 0.38  | 0.178 | 0.395 |
| f__Rikenellaceae;g__         | 3.67  | 2.38  | 4.47  | 3.18  | 0.744 | 0.898 |
| AF12                         | 0.09  | 0.21  | 0.47  | 0.81  | 0.105 | 0.292 |
| Rikenella                    | 0.12  | 0.17  | 0.81  | 1.62  | 0.740 | 0.898 |
| ;f__S24-7;g__                | 28.23 | 15.35 | 42.38 | 15.40 | 0.060 | 0.215 |
| Odoribacter                  | 4.45  | 4.34  | 5.63  | 2.35  | 0.191 | 0.395 |
| [Prevotella]                 | 2.69  | 3.03  | 1.82  | 2.82  | 0.086 | 0.262 |
| o__YS2;f__;g__               | 0.00  | 0.00  | 0.01  | 0.02  | 0.758 | 0.899 |
| o__Streptophyta;f__;g__      | 0.01  | 0.00  | 0.00  | 0.00  | 0.007 | 0.079 |
| Enterococcus                 | 0.04  | 0.10  | 0.00  | 0.00  | 0.027 | 0.146 |
| Lactobacillus                | 2.40  | 2.66  | 5.45  | 7.64  | 1.000 | 1.000 |
| Streptococcus                | 0.03  | 0.02  | 0.02  | 0.03  | 0.342 | 0.521 |
| Turicibacter                 | 1.15  | 3.13  | 0.02  | 0.01  | 0.019 | 0.129 |
| o__Clostridiales;Other;Other | 0.68  | 1.46  | 0.36  | 0.56  | 0.461 | 0.641 |
| o__Clostridiales;f__;g__     | 22.93 | 7.48  | 18.90 | 7.53  | 0.568 | 0.741 |
| f__Christensenellaceae;g__   | 0.01  | 0.01  | 0.01  | 0.01  | 0.376 | 0.560 |
| f__Clostridiaceae;g__        | 0.09  | 0.08  | 0.16  | 0.10  | 0.086 | 0.262 |
| Candidatus Arthromitus       | 0.10  | 0.13  | 0.04  | 0.05  | 0.190 | 0.395 |
| Clostridium                  | 0.11  | 0.16  | 0.07  | 0.09  | 0.837 | 0.940 |
| SMB53                        | 0.00  | 0.01  | 0.00  | 0.00  | 0.022 | 0.129 |
| Dehalobacterium              | 0.18  | 0.08  | 0.15  | 0.07  | 0.307 | 0.491 |
| f__Lachnospiraceae;Other     | 0.23  | 0.18  | 0.15  | 0.12  | 0.327 | 0.511 |
| f__Lachnospiraceae;g__       | 7.56  | 5.75  | 4.52  | 3.78  | 0.142 | 0.362 |
| Anaerostipes                 | 0.01  | 0.01  | 0.02  | 0.05  | 0.286 | 0.473 |
| Coprococcus                  | 0.52  | 0.29  | 0.31  | 0.11  | 0.094 | 0.273 |
| Dorea                        | 0.09  | 0.04  | 0.07  | 0.03  | 0.413 | 0.600 |
| Roseburia                    | 0.00  | 0.00  | 0.01  | 0.02  | 0.230 | 0.415 |
| [Ruminococcus]               | 1.15  | 0.56  | 0.60  | 0.33  | 0.022 | 0.129 |
| f__Peptococcaceae;g__        | 0.04  | 0.05  | 0.04  | 0.06  | 0.682 | 0.857 |

|                              |      |      |      |      |       |       |
|------------------------------|------|------|------|------|-------|-------|
| f__Peptostreptococcaceae;g__ | 0.03 | 0.06 | 0.00 | 0.00 | 0.068 | 0.230 |
| f__Ruminococcaceae;Other     | 0.01 | 0.01 | 0.02 | 0.03 | 0.901 | 0.961 |
| f__Ruminococcaceae;g__       | 1.76 | 0.49 | 2.13 | 1.16 | 0.289 | 0.473 |
| ;g__Ruminococcus             | 1.46 | 0.79 | 0.82 | 0.43 | 0.037 | 0.151 |
| f__[Mogibacteriaceae];g__    | 0.06 | 0.04 | 0.03 | 0.02 | 0.152 | 0.374 |
| f__Erysipelotrichaceae;g__   | 0.11 | 0.06 | 0.13 | 0.11 | 1.000 | 1.000 |
| Allobaculum                  | 0.06 | 0.07 | 0.15 | 0.23 | 1.000 | 1.000 |
| Coprobacillus                | 0.04 | 0.05 | 0.03 | 0.04 | 0.774 | 0.901 |
| Phyllobacterium              | 0.23 | 0.63 | 0.00 | 0.00 | 0.202 | 0.404 |
| f__mitochondria;Other        | 0.03 | 0.04 | 0.01 | 0.01 | 0.052 | 0.197 |
| Sphingomonas                 | 0.00 | 0.00 | 0.00 | 0.00 | 0.426 | 0.606 |
| Sutterella                   | 0.13 | 0.24 | 1.19 | 0.97 | 0.002 | 0.030 |
| Desulfovibrionaceae;Other    | 0.34 | 0.31 | 0.11 | 0.17 | 0.034 | 0.151 |
| f__Desulfovibrionaceae;g__   | 0.00 | 0.00 | 0.00 | 0.00 | 0.862 | 0.944 |
| Bilophila                    | 0.01 | 0.01 | 0.00 | 0.01 | 0.255 | 0.440 |
| Desulfovibrio                | 0.13 | 0.25 | 0.27 | 0.28 | 0.037 | 0.151 |
| f__Helicobacteraceae;Other   | 0.00 | 0.00 | 0.00 | 0.00 | 0.003 | 0.041 |
| f__Helicobacteraceae;g__     | 0.13 | 0.07 | 0.05 | 0.01 | 0.010 | 0.091 |
| Flexispira                   | 5.72 | 5.02 | 0.01 | 0.01 | 0.002 | 0.030 |
| Helicobacter                 | 7.75 | 6.81 | 0.07 | 0.11 | 0.002 | 0.030 |
| Aeromonadaceae;g__           | 0.00 | 0.00 | 0.04 | 0.06 | 0.000 | 0.013 |
| f__Enterobacteriaceae;g__    | 0.01 | 0.01 | 0.06 | 0.06 | 0.017 | 0.129 |
| f__F16;g__                   | 0.05 | 0.05 | 0.04 | 0.04 | 0.219 | 0.415 |
| Anaeroplasma                 | 0.18 | 0.22 | 0.14 | 0.14 | 0.683 | 0.857 |
| Mycoplasma                   | 0.01 | 0.01 | 0.01 | 0.01 | 0.798 | 0.912 |
| o__RF39;f__;g__              | 0.18 | 0.15 | 0.28 | 0.19 | 0.221 | 0.415 |
| Akkermansia                  | 0.03 | 0.02 | 0.03 | 0.02 | 0.934 | 0.980 |

**Supplemental figure 1.** Uncropped gels of blots presented in figures 5, 7 and 9. Cropped gels blots are reported when the PVDF membranes for Western Blot were cut into strips to minimize the amount of antibodies that are necessary for analysis.

**Supplemental Fig 1 - Uncropped gels**

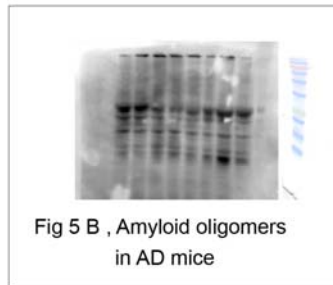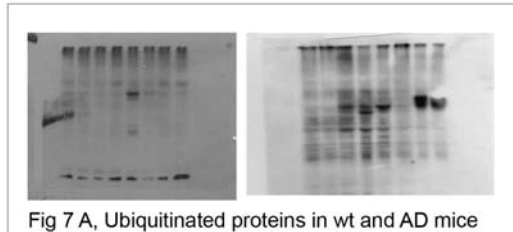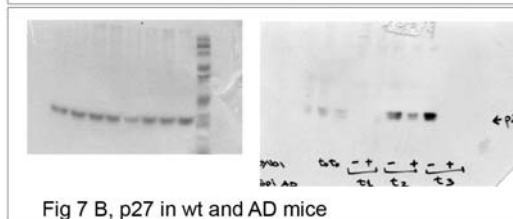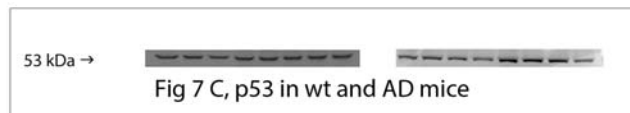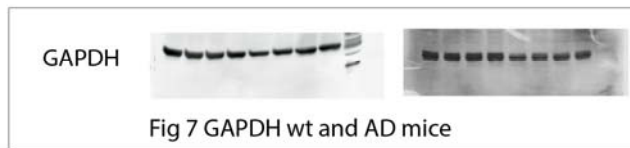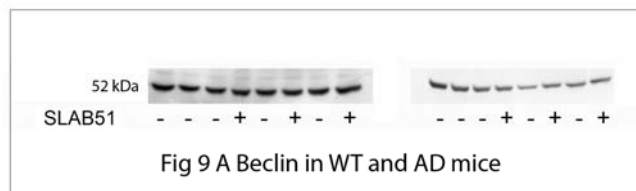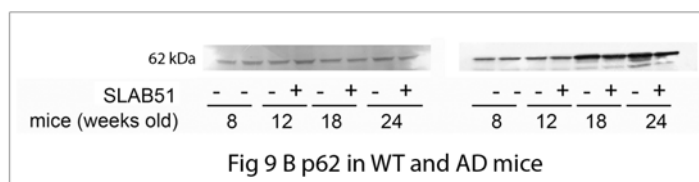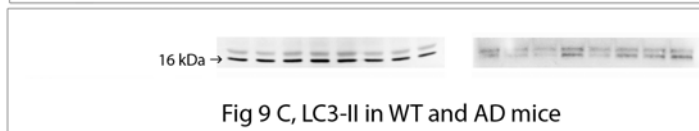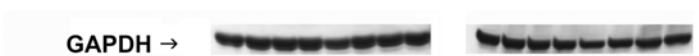

Supplement: 41598_2017_2587_MOESM1_ESM.pdf [file 41598_2017_2587_MOESM1_ESM.pdf]
